## SUPPLEMENTARY FIGURES

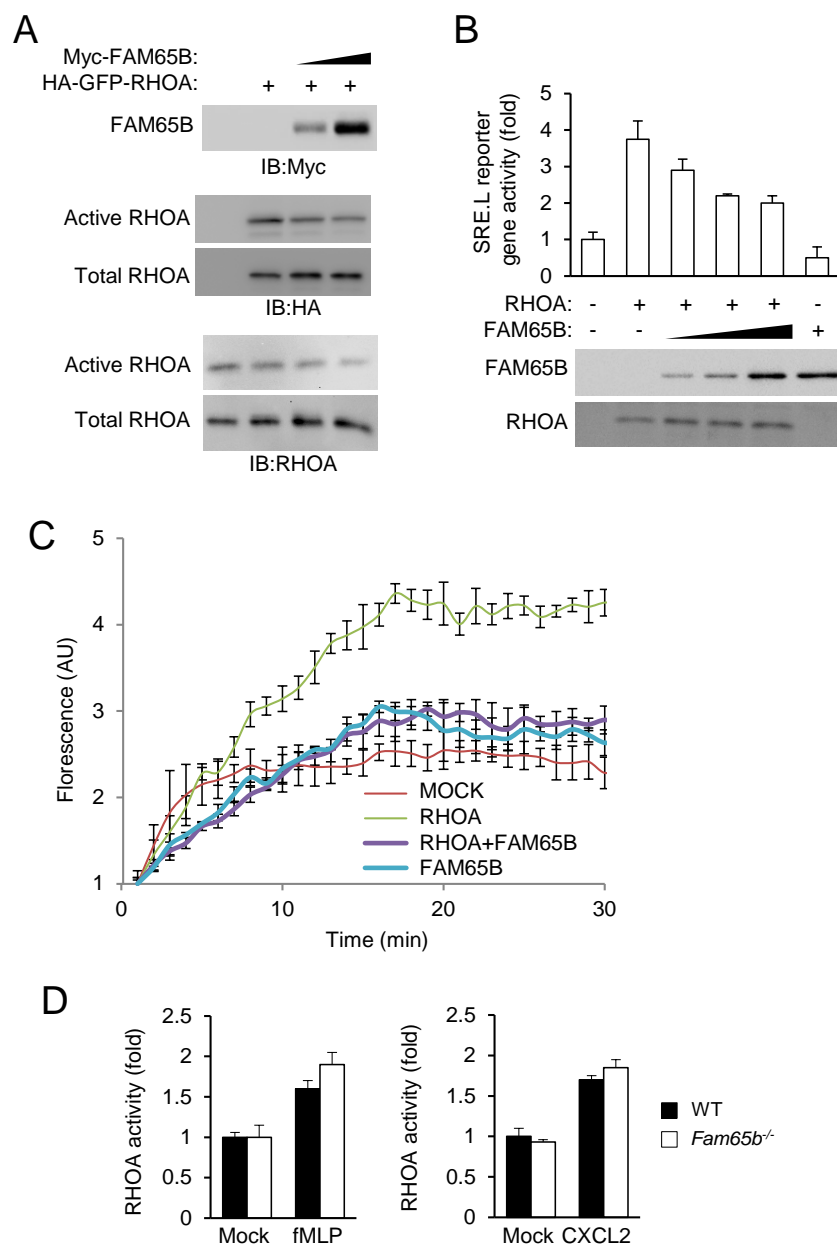

**Figure S1. FAM65B inhibits RHOA.** **A.** Expression of FAM65B in HEK293 cells suppresses the activity of coexpressed and endogenous RHOA. Active RHOA was assessed by the RBD pull down assay. **B.** Expression of FAM65B inhibits RHOA-induced activation of SER.L reporter gene in HEK293 cells. **C.** Recombinant GST-FAM65B protein inhibits GTP loading to recombinant RHOA. **D.** Effect of FAM65B-deficiency on RHOA activity in response to high concentrations of chemoattractants. Neutrophils were stimulated with fMLP (1  $\mu$ M) or MIP2 (500 nM) for 3 min, followed by G-LISA assay. Error bars stand for standard derivations.

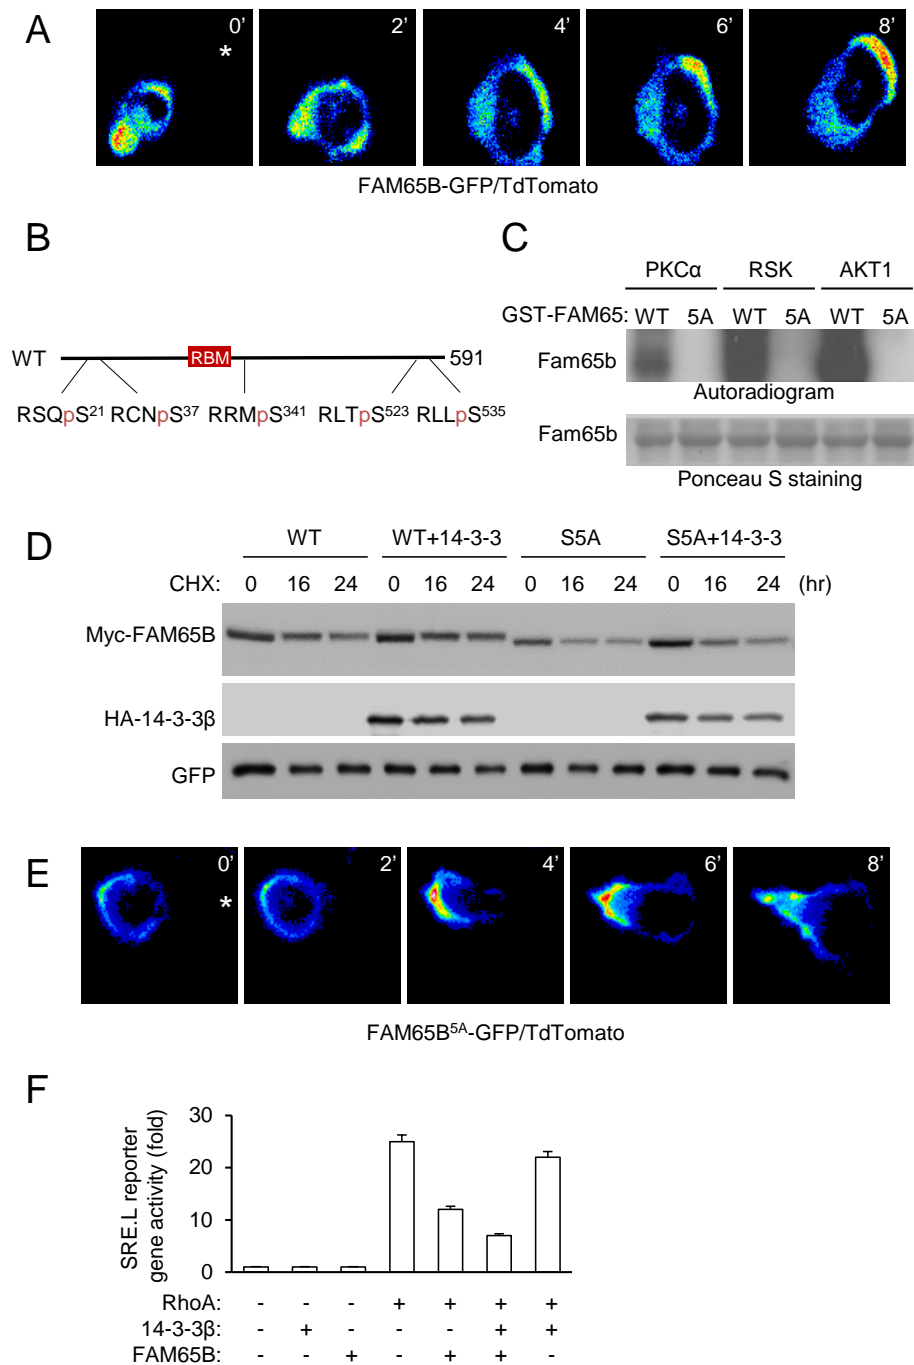

**Figure S2. Supplementary data for Figure 3 and 4.** **A,E.** Additional cells showing the localization of FAM65B-GFP (**A**) and FAM65B<sup>5A</sup>-GFP (**E**). **B.** Phosphorylation sites on FAM65B identified by MS. **C.** In vitro phosphorylation of FAM65B. Recombinant GST-FAM65B proteins were subjected to phosphorylation by recombinant PKCα, RSK and AKT1 in an in vitro kinase assay using [<sup>32</sup>P]γATP. **D.** Representative Western blotting images for Fig. 4C. **F.** The 14-3-3 protein does not decrease the inhibitory effect of FAM65B on RHOA-induced activation of the SRE.L reporter gene in HEK293 cells.

|            | RFP      | Fam65b <sup>5A</sup> |
|------------|----------|----------------------|
| ADE (deg)  | 49±5.2   | 41±4.3               |
| M (µm/min) | 1.1±0.21 | 1.4±0.19             |

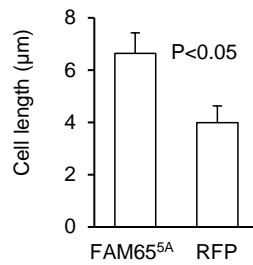

**Figure S3. Effect of expression of FAM65B<sup>5A</sup> mutant on neutrophil chemotaxis.** Mouse neutrophils were transfected with RFP and FAM65B<sup>5A</sup>-GFP, respectively, and mixed at 1:1 ratio followed by the chemotaxis assay in a Dunn chamber as described in Fig. 2F. Chemotactic parameters including ADE (average directional error) and motility (motility) as well as cell body length are shown (Student's t-test, n>30).

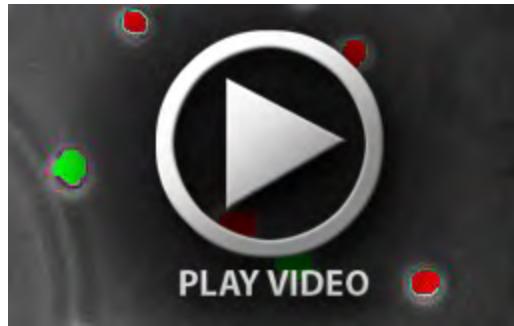

**Movie 1:** A representative movie shows neutrophil migration in a Dunn chamber under an fMLP gradient. Equal numbers of WT (labelled with a red dye) and FAM65B-null (labelled with a green dye) neutrophils were mixed and subjected to the chemotaxis assay. The first image is the overlay of fluorescent and phase-contrast images to allow genotype identification. The rest of time-lapses images were taken under the phase contrast setting. The fMLP gradient is from right to left.

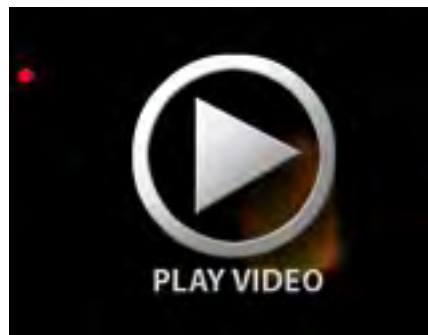

Movie 2

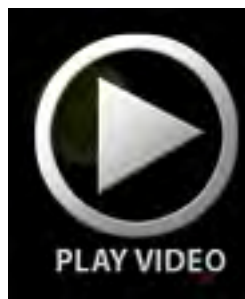

Movie 3

**Movie 2 and 3:** Localization of FAM65B-GFP and LifeAct-RFP in mouse neutrophils. Neutrophils expressing WT FAM65B-GFP (Movie 2) or FAM65B<sup>5A</sup>-GFP (Movie 3) were stimulated by fMLP from a micropipette whose location is marked by the red dot in the first image.
